# Supplementary material for: Physico-Chemical Properties and Phosphorus Solubilization of Organomineral Fertilizers Derived from Sewage Sludge
Source: MDPI journal article supplement (doi:10.3390/soilsystems7040100), 2023-11-06
Supplement: s1 [file s1]

## SUPPLEMENTARY MATERIAL

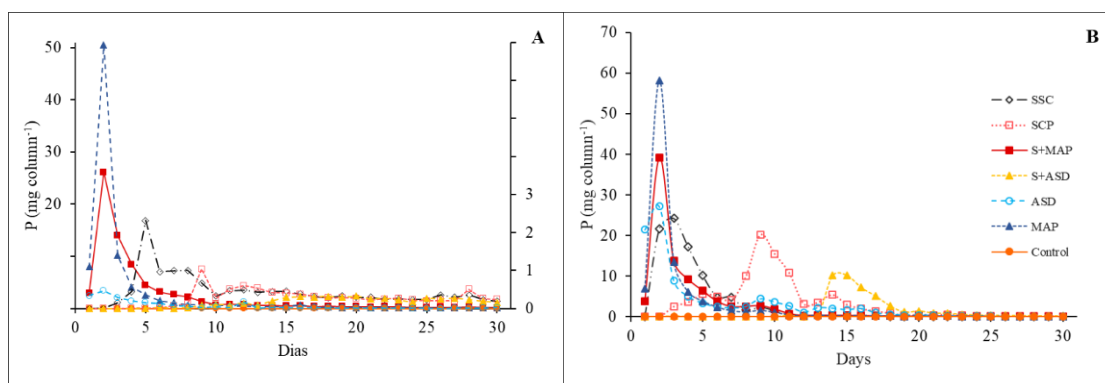

Figure S1. Daily leaching of P from the soil columns, with deionized water (A – left vertical axis for MAP and C+MAP, and right for the others) and citric acid (B). SSC = organic sewage sludge compost; SCP = pelletized organic sewage sludge compost; S+MAP = organic sewage sludge compost + MAP; S+ASD= organic sewage sludge compost + AshDec®; ASD = AshDec®; MAP = monoammonium phosphate

**Table S1.** Chemical analysis of sewage sludge and organic sewage sludge compost from WWT Bela Vista – Piracicaba, SP.

| Determinations                              | Sewage sludge      |          | Organic compost    |          |
|---------------------------------------------|--------------------|----------|--------------------|----------|
|                                             | Dry base<br>(65°C) | Wet base | Dry base<br>(65°C) | Wet base |
| pH (CaCl <sub>2</sub> 0,01 M)               | -                  | 7,1      | -                  | 6,4      |
|                                             | ----- % -----      |          |                    |          |
| Total organic matter                        | 72.64              | 11.47    | 67.92              | 65.42    |
| Organic Carbon                              | 31.22              | 4.93     | 36.52              | 35.18    |
| Total mineral residue                       | 20.96              | 3.31     | 26.76              | 25.78    |
| Nitrogen (N)                                | 6.78               | 1.07     | 3.73               | 3.59     |
| Phosphorus (P <sub>2</sub> O <sub>5</sub> ) | 2.41               | 0.38     | 2.46               | 2.37     |
| Potassium K <sub>2</sub> O                  | 0.19               | 0.03     | 1.10               | 1.06     |
| Calcium (Ca)                                | 0.82               | 0.13     | 3.08               | 2.97     |
| Magnesium (Mg)                              | 0.32               | 0.05     | 0.63               | 0.61     |
| Sulfur (S)                                  | 0.13               | 0.02     | 0.52               | 0.50     |
|                                             | ----- mg/kg -----  |          |                    |          |
| Copper (Cu)                                 | 108.00             | 17.00    | 94.00              | 91.00    |
| Manganese (Mn)                              | 196.00             | 31.00    | 274.00             | 264.00   |
| Zinc (Zn)                                   | 469.00             | 74.00    | 407.00             | 392.00   |
| Iron (Fe)                                   | 12483.00           | 1971.00  | 13073.00           | 12592.00 |
| Boron (B)                                   | 25.00              | 4.00     | 15.00              | 14.00    |
| Sodium (Na)                                 | 969.00             | 153.00   | 898.00             | 865.00   |
| Nickel (Ni)                                 | 26.04              | -        | 15.42              | -        |
| Selenium (Se)                               | <4.00              | -        | <4.00              | -        |
| Arsenic (As)                                | 4.97               | -        | 2.71               | -        |
| Cadmium (Cd)                                | <2.00              | -        | <2.00              | -        |
| Lead (Pb)                                   | 18.99              | -        | 16.71              | -        |
| Mercury (Hg)                                | <2.00              | -        | 0.34               | -        |

**Table S2.** Soil P fractionation of columns leached with deionized water. Fractions separated by lability.

| P source                        | Labile    | Mod labile | Non labile          | Labile   | Mod labile | Non labile |
|---------------------------------|-----------|------------|---------------------|----------|------------|------------|
| ----- mg kg <sup>-1</sup> ----- |           |            |                     |          |            |            |
|                                 | 0 - 1     |            |                     | 1 - 2    |            |            |
| <b>Control</b>                  | 17.11 e   | 40.36 c    | 61.76 c             | 15.04 d  | 39.88 c    | 74.79 b    |
| <b>SSC</b>                      | 180.52 d  | 140.36 b   | 87.76 b             | 157.57 a | 161.50 a   | 72.67 b    |
| <b>SCP</b>                      | 166.82 d  | 90.10 b    | 74.70 c             | 124.43 b | 80.59 b    | 60.71 b    |
| <b>S+MAP</b>                    | 147.71 d  | 118.96 b   | 116.73 b            | 123.95 b | 100.26 b   | 61.49 b    |
| <b>S+ASD</b>                    | 1165.48 b | 66.69 c    | 77.72 c             | 58.00 c  | 63.36 b    | 62.13 b    |
| <b>ASD</b>                      | 1732.43 a | 7774.74 a  | 312.90 a            | 179.79 a | 193.24 a   | 105.19 a   |
| <b>MAP</b>                      | 306.37 c  | 191.87 b   | 95.98 b             | 138.69 b | 99.94 b    | 66.48 b    |
|                                 | 2 - 6     |            |                     | 6 - 10   |            |            |
| <b>Control</b>                  | 15.77 d   | 40.02 c    | 66.10 <sup>ns</sup> | 16.56 c  | 42.90 c    | 78.06 a    |
| <b>SSC</b>                      | 150.10 a  | 103.31 a   | 74.15               | 138.34 a | 166.40 a   | 75.60 a    |
| <b>SCP</b>                      | 118.02 b  | 88.01 a    | 65.55               | 109.14 a | 89.65 b    | 64.41 b    |
| <b>S+MAP</b>                    | 101.83 b  | 79.56 a    | 63.96               | 146.76 a | 97.38 b    | 71.70 b    |
| <b>S+ASD</b>                    | 50.85 c   | 60.45 b    | 60.66               | 49.91 c  | 58.79 c    | 64.55 b    |
| <b>ASD</b>                      | 54.85 c   | 89.46 a    | 66.16               | 43.89 c  | 88.53 b    | 83.98 a    |
| <b>MAP</b>                      | 76.08 c   | 94.53 a    | 72.77               | 82.04 b  | 87.71 b    | 85.01 a    |

Equal letters do not differ statistically according to the Scott-Knott test at 5% significance level (n=3). SSC = organic sewage sludge compost; SCP = pelletized sludge compost; S+MAP = compost + MAP; S+ASD = compost + AshDec®; ASD = AshDec®; MAP = monoammonium phosphate; and control.

**Table S3.** Soil P fractionation from columns leached with 2% citric acid. Fractions separated by lability.

| P source                        | Labile  | Mod labile          | Non-labile          | Lábil   | Mod lábil           | Não lábil           |
|---------------------------------|---------|---------------------|---------------------|---------|---------------------|---------------------|
| ----- mg kg <sup>-1</sup> ----- |         |                     |                     |         |                     |                     |
|                                 | 0-1     |                     |                     | 1-2     |                     |                     |
| <b>Control</b>                  | 17.85 b | 33.71 <sup>ns</sup> | 56.92 <sup>ns</sup> | 28.73 b | 31.53 b             | 58.55 <sup>ns</sup> |
| <b>SSC</b>                      | 24.83 b | 55.54               | 47.75               | 20.40 b | 46.46 a             | 44.04               |
| <b>SCP</b>                      | 38.85 a | 61.22               | 43.47               | 53.27 a | 59.77 a             | 52.34               |
| <b>S+MAP</b>                    | 21.36 b | 46.34               | 44.08               | 27.62 b | 44.05 a             | 41.05               |
| <b>S+ASD</b>                    | 35.70 a | 47.66               | 45.43               | 42.04 a | 50.24 a             | 45.83               |
| <b>ASD</b>                      | 21.89 b | 43.23               | 49.54               | 21.89 b | 46.70 a             | 50.66               |
| <b>MAP</b>                      | 17.46 b | 45.26               | 45.37               | 17.87 b | 46.05 a             | 59.13               |
|                                 | 2 - 6   |                     |                     | 6 - 10  |                     |                     |
| <b>Control</b>                  | 13.64 d | 41.23 <sup>ns</sup> | 59.61 <sup>ns</sup> | 12.35 d | 31.30 <sup>ns</sup> | 49.92 a             |
| <b>SSC</b>                      | 21.17 c | 48.69               | 44.95               | 23.34 c | 47.24               | 44.94 b             |
| <b>SCP</b>                      | 39.54 a | 56.93               | 49.40               | 42.35 b | 48.78               | 44.12 b             |
| <b>S+MAP</b>                    | 30.58 b | 42.66               | 48.28               | 27.77 c | 38.92               | 53.37 a             |
| <b>S+ASD</b>                    | 34.64 b | 49.66               | 52.31               | 41.38 b | 49.29               | 55.01 a             |
| <b>ASD</b>                      | 25.25 c | 47.61               | 49.27               | 72.32 a | 50.41               | 52.40 a             |
| <b>MAP</b>                      | 26.33 c | 43.37               | 55.09               | 29.04 c | 44.88               | 71.10 a             |

Equal letters do not differ statistically according to the Scott-Knott test at 5% significance level (n=3). SSC = organic sewage sludge compost; SCP = pelletized sludge compost; S+MAP = compost + MAP; S+ASD = compost + AshDec®; ASD = AshDec®; MAP = monoammonium phosphate; and control.

**Table S4.** Soil P fractionation of columns leached with deionized water. Fractions separated by extractors.

| Tratamento | Lábil       |        |        | Moderadamente Lábil |            |        | Não Lábil  |            |          | Total  |
|------------|-------------|--------|--------|---------------------|------------|--------|------------|------------|----------|--------|
|            | P (mg kg-1) |        |        |                     |            |        |            |            |          |        |
|            | P-RTA       | Pi-Bic | Po-Bic | Pi-Hid 0,1          | Po-Hid 0,1 | P-HCl  | Pi-Hid 0,5 | Po-Hid 0,5 | P resid. |        |
| 0 - 1      |             |        |        |                     |            |        |            |            |          |        |
| Controle   | 1.2         | 1.9    | 14.0   | 9.5                 | 28.8       | 2.0    | 15.6       | 9.5        | 36.7     | 119.2  |
| CLE        | 97.1        | 78.3   | 5.1    | 116.0               | 10.8       | 13.5   | 20.3       | 13.5       | 53.9     | 408.6  |
| CLP        | 105.2       | 41.7   | 19.8   | 79.4                | 2.9        | 7.8    | 15.6       | 8.3        | 50.8     | 331.6  |
| C+MAP      | 79.8        | 46.2   | 21.7   | 79.4                | 2.9        | 7.8    | 16.6       | 17.2       | 82.9     | 383.4  |
| C+ASD      | 63.1        | 12.9   | 1259.0 | 98.1                | 12.4       | 8.5    | 14.5       | 11.4       | 51.8     | 1479.5 |
| ASD        | 630.1       | 1017.8 | 84.5   | 142.7               | 133.0      | 7499.0 | 133.6      | 46.1       | 91.0     | 9777.9 |
| MAP        | 128.8       | 211.3  | 18.4   | 171.4               | 11.9       | 8.6    | 19.4       | 9.0        | 67.5     | 646.2  |
| 1 - 2 cm   |             |        |        |                     |            |        |            |            |          |        |
| Controle   | 0.9         | 2.5    | 11.6   | 10.0                | 27.8       | 2.0    | 13.1       | 3.8        | 57.9     | 129.7  |
| CLE        | 80.5        | 53.8   | 23.2   | 122.1               | 23.5       | 16.0   | 16.9       | 12.7       | 43.1     | 391.8  |
| CLP        | 74.8        | 28.6   | 21.0   | 62.6                | 13.0       | 5.0    | 13.1       | 8.8        | 38.8     | 265.7  |
| C+MAP      | 66.5        | 43.4   | 14.0   | 71.5                | 22.9       | 5.8    | 14.2       | 10.3       | 37.0     | 285.7  |
| C+ASD      | 34.2        | 5.2    | 18.6   | 46.2                | 13.4       | 3.8    | 12.3       | 8.4        | 41.4     | 183.5  |
| ASD        | 87.0        | 75.0   | 17.7   | 80.5                | 1.3        | 111.4  | 33.0       | 19.0       | 53.2     | 478.2  |
| MAP        | 69.7        | 51.4   | 17.6   | 77.6                | 17.1       | 5.2    | 16.6       | 8.9        | 41.0     | 305.1  |
| 2 - 6 cm   |             |        |        |                     |            |        |            |            |          |        |
| Controle   | 1.2         | 2.3    | 12.3   | 10.6                | 27.3       | 2.2    | 12.5       | 6.3        | 47.3     | 121.9  |
| CLE        | 72.9        | 66.9   | 10.3   | 85.7                | 7.1        | 10.5   | 16.5       | 13.3       | 44.4     | 327.6  |
| CLP        | 72.4        | 34.7   | 10.9   | 74.1                | 7.9        | 6.0    | 14.3       | 7.3        | 43.9     | 271.6  |
| C+MAP      | 58.9        | 33.0   | 9.9    | 69.7                | 4.9        | 5.0    | 13.8       | 8.5        | 41.6     | 245.3  |
| C+ASD      | 27.8        | 12.8   | 10.2   | 37.6                | 19.1       | 3.8    | 37.6       | 19.1       | 3.8      | 171.8  |
| ASD        | 27.8        | 12.8   | 10.2   | 63.2                | 17.9       | 8.4    | 18.7       | 5.8        | 41.6     | 206.5  |
| MAP        | 26.5        | 32.5   | 17.1   | 66.1                | 23.5       | 5.0    | 15.6       | 10.2       | 47.0     | 243.4  |
| 6 - 10 cm  |             |        |        |                     |            |        |            |            |          |        |
| Controle   | 1.2         | 2.4    | 13.0   | 11.6                | 28.8       | 2.5    | 17.8       | 2.4        | 57.9     | 137.5  |
| CLE        | 63.3        | 69.7   | 5.3    | 141.5               | 10.7       | 14.2   | 19.5       | 10.1       | 46.1     | 380.3  |
| CLP        | 56.8        | 37.4   | 14.9   | 75.1                | 7.6        | 6.9    | 15.1       | 6.8        | 42.5     | 263.2  |
| C+MAP      | 57.6        | 42.8   | 46.4   | 79.5                | 11.6       | 6.3    | 15.2       | 8.6        | 37.9     | 305.8  |
| C+ASD      | 29.9        | 6.6    | 13.3   | 44.5                | 10.3       | 4.0    | 11.9       | 7.4        | 45.3     | 173.2  |
| ASD        | 14.9        | 25.4   | 3.6    | 60.8                | 17.6       | 10.1   | 18.3       | 5.9        | 59.8     | 216.4  |
| MAP        | 24.5        | 41.4   | 16.2   | 69.6                | 12.6       | 5.5    | 15.7       | 8.9        | 60.4     | 254.8  |

SSC = organic sewage sludge compost; SCP = pelletized sludge compost; S+MAP = compost + MAP; S+ASD = compost + AshDec®; ASD = AshDec®; MAP = monoammonium phosphate; and control.

**Table S5.** Soil P fractionation of the columns leached with 2% citric acid. Fractions separated by extractors.

| P source | Labile                   |                        | Moderately-labile      |             |             |     | Non-labile  |             |      | Residual | Total |
|----------|--------------------------|------------------------|------------------------|-------------|-------------|-----|-------------|-------------|------|----------|-------|
|          | P (mg kg <sup>-1</sup> ) |                        |                        |             |             |     |             |             |      |          |       |
|          | Resin                    | NaHCO <sub>3</sub> (i) | NaHCO <sub>3</sub> (o) | NaOH 0.1(i) | NaOH 0.1(o) | HCl | NaOH 0.5(i) | NaOH 0.5(o) |      |          |       |
| 0-1      |                          |                        |                        |             |             |     |             |             |      |          |       |
| Control  | 7.2                      | 4.4                    | 6.3                    | 7.1         | 25.9        | 0.7 | 15.9        | 4.7         | 36.4 | 108.5    |       |
| SSC      | 9.8                      | 7.0                    | 8.0                    | 15.2        | 38.9        | 1.4 | 6.9         | 3.9         | 37.0 | 128.1    |       |
| SCP      | 11.3                     | 14.4                   | 13.1                   | 20.5        | 37.9        | 2.8 | 8.8         | 4.0         | 30.6 | 143.5    |       |
| S+MAP    | 6.7                      | 6.3                    | 7.1                    | 11.5        | 34.0        | 0.8 | 7.2         | 6.6         | 30.3 | 110.6    |       |
| S+ASD    | 13.5                     | 12.5                   | 9.7                    | 19.7        | 26.4        | 1.6 | 8.7         | 6.3         | 30.5 | 128.8    |       |
| ASD      | 6.6                      | 13.6                   | 1.7                    | 14.7        | 23.7        | 4.8 | 14.1        | 1.2         | 34.3 | 114.7    |       |
| MAP      | 6.7                      | 7.1                    | 3.7                    | 20.4        | 22.3        | 2.6 | 7.4         | 3.9         | 34.1 | 108.1    |       |
| 1-2      |                          |                        |                        |             |             |     |             |             |      |          |       |
| Control  | 9.9                      | 5.8                    | 13.1                   | 7.4         | 23.1        | 1.0 | 13.8        | 8.0         | 36.7 | 118.8    |       |
| SSC      | 5.9                      | 6.3                    | 8.2                    | 16.1        | 28.7        | 1.6 | 7.8         | 3.4         | 32.9 | 110.9    |       |
| SCP      | 13.8                     | 14.1                   | 18.9                   | 19.8        | 30.4        | 2.5 | 9.1         | 5.2         | 38.0 | 151.8    |       |
| S+MAP    | 6.2                      | 6.3                    | 15.2                   | 12.8        | 30.3        | 0.9 | 6.9         | 5.5         | 28.6 | 112.7    |       |
| S+ASD    | 13.9                     | 12.8                   | 15.4                   | 19.5        | 28.9        | 1.8 | 8.9         | 3.1         | 33.9 | 138.1    |       |
| ASD      | 9.0                      | 10.5                   | 2.3                    | 17.7        | 25.3        | 3.8 | 11.0        | 4.0         | 35.7 | 119.3    |       |
| MAP      | 8.8                      | 7.0                    | 2.1                    | 18.0        | 23.5        | 4.6 | 8.0         | 8.3         | 42.8 | 123.1    |       |
| 2-6      |                          |                        |                        |             |             |     |             |             |      |          |       |
| Control  | 4.4                      | 3.9                    | 5.3                    | 6.9         | 24.7        | 9.6 | 13.7        | 7.1         | 38.9 | 114.5    |       |
| SSC      | 9.0                      | 8.7                    | 3.4                    | 18.4        | 28.6        | 1.7 | 8.1         | 3.2         | 33.6 | 114.8    |       |
| SCP      | 14.8                     | 14.0                   | 10.7                   | 20.4        | 31.4        | 2.3 | 9.8         | 6.2         | 33.4 | 143.0    |       |
| S+MAP    | 12.9                     | 6.8                    | 10.9                   | 16.4        | 24.9        | 1.4 | 7.6         | 10.1        | 30.6 | 121.5    |       |
| S+ASD    | 16.7                     | 14.5                   | 3.4                    | 20.4        | 26.8        | 2.4 | 13.3        | 8.0         | 31.0 | 136.6    |       |
| ASD      | 9.4                      | 13.5                   | 2.4                    | 19.7        | 25.4        | 2.5 | 10.9        | 1.4         | 37.0 | 122.1    |       |
| MAP      | 13.3                     | 9.8                    | 3.2                    | 19.5        | 21.0        | 2.8 | 9.0         | 6.1         | 40.0 | 124.8    |       |
| 6-10     |                          |                        |                        |             |             |     |             |             |      |          |       |
| Control  | 4.9                      | 4.1                    | 3.4                    | 6.5         | 23.8        | 1.0 | 11.0        | 7.0         | 31.9 | 93.6     |       |
| SSC      | 10.3                     | 9.4                    | 3.6                    | 20.5        | 25.0        | 1.7 | 8.3         | 3.2         | 33.4 | 115.5    |       |
| SCP      | 18.7                     | 14.5                   | 6.0                    | 22.1        | 18.8        | 2.5 | 10.3        | 3.0         | 27.3 | 123.2    |       |
| S+MAP    | 11.0                     | 10.1                   | 6.7                    | 18.1        | 18.8        | 2.0 | 9.7         | 8.4         | 35.2 | 120.1    |       |
| S+ASD    | 21.8                     | 15.4                   | 4.2                    | 22.9        | 22.1        | 4.2 | 9.5         | 4.6         | 40.9 | 145.7    |       |
| ASD      | 19.4                     | 12.5                   | 40.4                   | 21.8        | 24.0        | 4.6 | 9.0         | 2.8         | 40.6 | 175.1    |       |
| MAP      | 12.8                     | 9.3                    | 7.0                    | 20.9        | 19.6        | 1.7 | 8.8         | 4.5         | 57.8 | 142.4    |       |

SSC = organic sewage sludge compost; SCP = pelletized sludge compost; S+MAP = compost + MAP; S+ASD = compost + AshDec<sup>®</sup>; ASD = AshDec<sup>®</sup>; MAP = monoammonium phosphate; and control.
